# Supplementary material for: Genome-Wide Association Study of Polymorphisms Predisposing to Bronchiolitis
Source: PubMed Central journal article supplement (PMC5282585; doi:10.1038/srep41653), 2017-01-31
Supplement: srep41653-s1.pdf [file srep41653-s1.pdf]

## SUPPLEMENTARY MATERIAL

### GENOME-WIDE ASSOCIATION STUDY OF POLYMORPHISMS PREDISPOSING TO BRONCHIOLITIS

Anu Pasanen<sup>1\*</sup>, Minna K. Karjalainen<sup>1</sup>, Louis Bont<sup>2</sup>, Eija Piippo-Savolainen<sup>3</sup>, Marja Ruotsalainen<sup>3</sup>, Emma Goksör<sup>4</sup>, Kuldeep Kumawat<sup>5</sup>, Hennie Hodemaekers<sup>6</sup>, Kirsi Nuolivirta<sup>7</sup>, Tuomas Jartti<sup>8</sup>, Göran Wennergren<sup>4</sup>, Mikko Hallman<sup>1</sup>, Mika Rämet<sup>1,9†</sup>, Matti Korppi<sup>10†</sup>

\* **Correspondence:** Anu Pasanen, MSc, Department of Children and Adolescents, Institute of Clinical Medicine, University of Oulu, 90220 Oulu, Finland. Tel. +358 50 342 7253, Fax +358 8 315 5559, E-mail: [anu.pasanen@oulu.fi](mailto:anu.pasanen@oulu.fi)

†These authors contributed equally to this work.

## **The enrollment of GWAS populations**

The Finnish individuals ( $n = 936$ ) in the GWAS discovery population originated from Kuopio (64 cases, 64 controls), Tampere (124 cases), and Helsinki/Kuopio (684 controls) regions. Cases from Kuopio comprised two prospective cohorts of term children admitted to Kuopio university hospital with bronchiolitis in 1981–1982 and 1992–1993<sup>1,2</sup>. Age matched controls (+/- two months) were collected for genetic analysis. Chronic pulmonary disease (including asthma) was an exclusion criterion for cases. For controls, exclusion criteria were wheezing or hospitalization before the age of 24 months. GWAS subjects from Tampere were healthy full-term infants less than 12 months of age hospitalized for bronchiolitis at Tampere university hospital<sup>3</sup>. The enrollment periods were between December 2001 and May 2002, and between October 2002 and May 2004. The controls from the Helsinki/Kuopio region were anonymous population controls obtained through the Nordic Control database (NordicDB)<sup>4,5</sup>. The controls were selected from the database based on a city of origin. Remaining outliers were excluded based on genome-wide identity-by-state (IBS) information. A Swedish subset of the GWAS population (29 cases and 30 controls) comprised a prospective cohort of children who were hospitalized with a first wheezing episode (wheezing bronchitis/acute bronchiolitis)<sup>6,7</sup> and age-matched controls (+/- two months). Hospitalizations occurred between March 1984 and November 1985.

## **Replication populations**

Dutch population ( $n = 848$ ) included previously healthy, native white Dutch children ( $n = 416$ ) who were hospitalized for RSV-associated LRI during 1992–2006 and unselected controls born in the Netherlands from a Dutch health examination survey, the Regenboog study ( $n = 432$ )<sup>8,9</sup>. Children with previous airway morbidity, wheeze or airway medication were excluded. A case set for further replication comprised 202 bronchiolitis cases aged 3–23 months collected in Turku, Finland, between September 2000 and May 2002, and between June 2007 and March 2010 (Vinku and Vinku2 studies)<sup>10,11</sup>. These

cases were tested against the NordicDB population controls. Exclusion criteria included more than one previous wheezing attack, inhaled or systemic corticosteroids and chronic nonatopic disease.

### **Quality control and imputation of the genome-wide data**

We performed quality control (QC) of the genome-wide SNP data with PLINK 1.90 beta (“PLINK 1.9”) <sup>12,13</sup> and removed samples with a genotype call rate of <97%. Variants with a minor allele frequency (MAF) of <0.01, a genotyping rate of <0.9 or deviation from Hardy–Weinberg equilibrium (HWE,  $p < 0.001$ ) were excluded. Based on pairwise identity-by-state (IBS) distances and identity-by-descent (IBD) similarities, fourteen samples were excluded as population outliers or to avoid confounding by cryptic relatedness (pihat cut-off 0.15). After QC, 995 study subjects were available for the analyses: 464 male subjects and 531 female subjects/217 cases and 778 controls. There were 79,563 autosomal SNPs with a MAF of >0.01.

Genome-wide data was prephased with SHAPEIT2, followed by genotype imputation (i.e., statistical prediction of missing genotypes) of autosomal chromosomes with IMPUTE2 <sup>14,15</sup>. The reference panel used for prephasing and imputation was the 1,000 Genomes Phase 3 integrated variant set (release in NCBI build 37 (hg19) coordinates, 12 October 2014). Populations from the areas of Kuopio and Gothenburg, which were genotyped in the same platform, were imputed together first, and the population from Tampere was imputed together with the NordicDB controls later. We combined the two imputed data sets and implemented basic QC measures, which entailed removing variants with  $MAF < 0.01$ , genotyping rate < 0.9, or deviation from HWE ( $p < 0.001$ ). An imputation info score of 0.7 was used as the cut-off value for excluding poorly imputed variants. The overall proportion of genotypes with non-missing data was 0.97. There were 5,304,323 SNPs post-imputation and QC.

## References

1. Reijonen, T., Korppi, M., Pitkakangas, S., Tenhola, S. & Remes, K. The clinical efficacy of nebulized racemic epinephrine and albuterol in acute bronchiolitis. *Arch. Pediatr. Adolesc. Med.* **149**, 686-692 (1995).
2. Korppi, M., Halonen, P., Kleemola, M. & Launiala, K. Viral findings in children under the age of two years with expiratory difficulties. *Acta Paediatr. Scand.* **75**, 457-464 (1986).
3. Koponen, P., Helminen, M., Paassilta, M., Luukkaala, T. & Korppi, M. Preschool asthma after bronchiolitis in infancy. *Eur. Respir. J.* **39**, 76-80 (2012).
4. Leu, M. *et al.* NordicDB: a Nordic pool and portal for genome-wide control data. *Eur. J. Hum. Genet.* **18**, 1322-1326 (2010).
5. Bilguvar, K. *et al.* Susceptibility loci for intracranial aneurysm in European and Japanese populations. *Nat. Genet.* **40**, 1472-1477 (2008).
6. Goksor, E. *et al.* High risk of adult asthma following severe wheezing in early life. *Pediatr. Pulmonol.* **50**, 789-797 (2015).
7. Wennergren, G. *et al.* Characteristics and prognosis of hospital-treated obstructive bronchitis in children aged less than two years. *Acta Paediatr.* **81**, 40-45 (1992).
8. Viet AL , Kroesbergen HT , Verhoeff AP , Seidell JC , Otten F , Veldhuizen H van. Risk Factors and Health in the Netherlands, a Survey by Municipal Public; Regional results. RIVM Report 260854005. (2004).
9. Janssen, R. *et al.* Genetic susceptibility to respiratory syncytial virus bronchiolitis is predominantly associated with innate immune genes. *J. Infect. Dis.* **196**, 826-834 (2007).
10. Lehtinen, P. *et al.* Prednisolone reduces recurrent wheezing after a first wheezing episode associated with rhinovirus infection or eczema. *J. Allergy Clin. Immunol.* **119**, 570-575 (2007).
11. Jartti, T. *et al.* Short- and long-term efficacy of prednisolone for first acute rhinovirus-induced wheezing episode. *J. Allergy Clin. Immunol.* **135**, 691-8.e9 (2015).
12. Chang, C. C. *et al.* Second-generation PLINK: rising to the challenge of larger and richer datasets. *Gigascience* **4**, 7-015-0047-8. eCollection 2015 (2015).
13. Chang, C. C. & Purcell, S. PLINK 1.9. <https://www.cog-genomics.org/plink2>.
14. O'Connell, J. *et al.* A General Approach for Haplotype Phasing across the Full Spectrum of Relatedness. *PLoS Genet.* **10**, e1004234. doi:10.1371/journal.pgen.1004234 (2014).
15. Howie, B. N., Donnelly, P. & Marchini, J. A flexible and accurate genotype imputation method for the next generation of genome-wide association studies. *PLoS Genet.* **5**, e1000529 (2009).

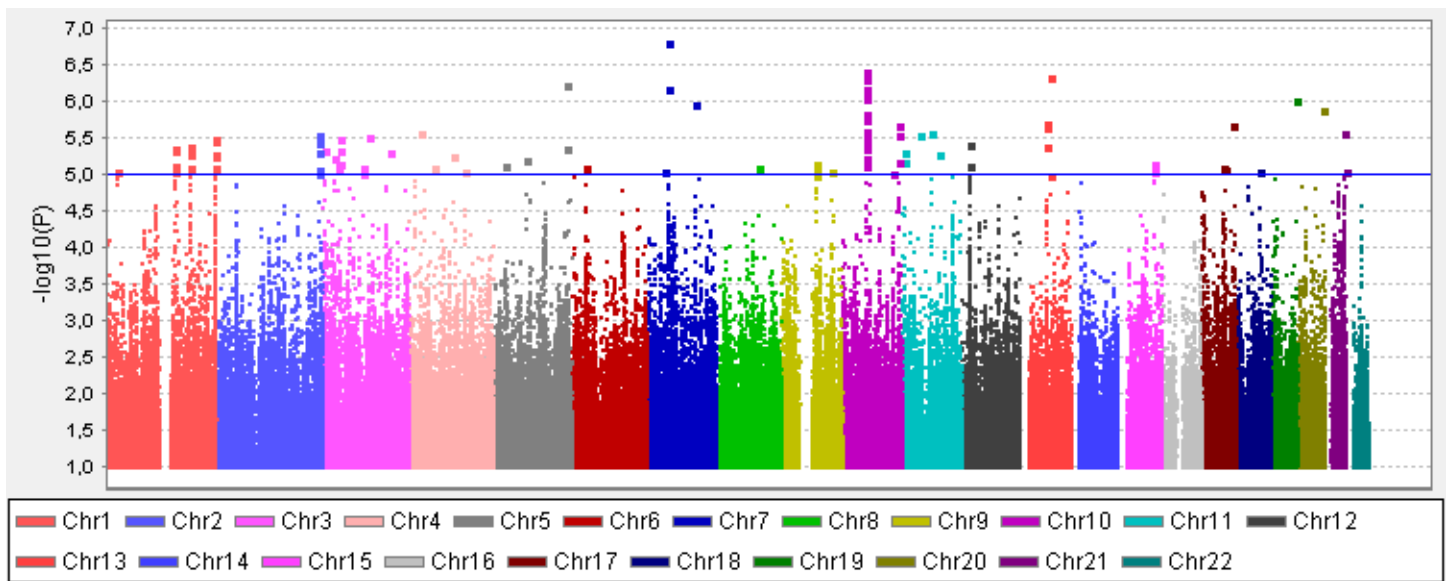

**Supplementary Figure S1.** Manhattan plot showing bronchiolitis GWAS results for the discovery population of 217 cases and 778 controls analyzed with logistic regression under an additive model. X-axis represents the genome in physical order, y-axis shows  $-\log_{10} p$  values for all SNPs (starting from 0.01). Blue line represents the threshold of suggestive associations ( $p < 1 \times 10^{-5}$ ). The stringent level of genome-wide significance ( $p < 5 \times 10^{-8}$ ) was not reached. The strongest suggestive signals were detected in the areas of *VSTM4*, *C10orf71*, and *DRGX* in chromosome 10 and *LOC105375265* and *LOC105375266* in chromosome 7.

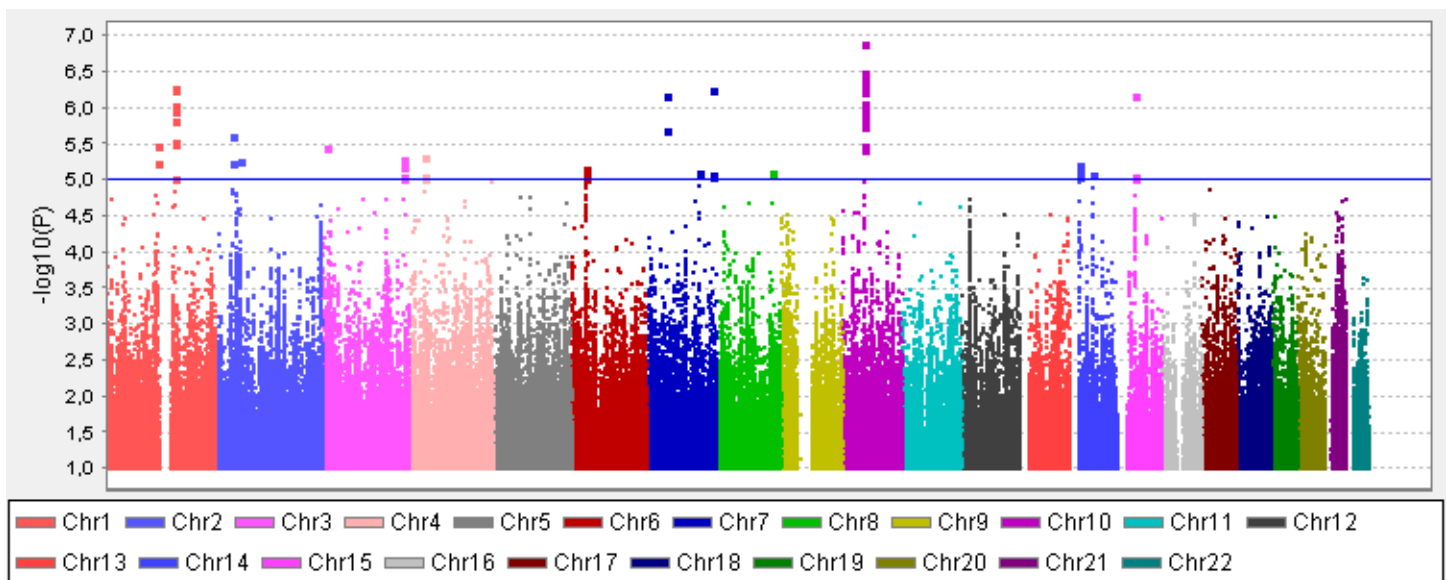

**Supplementary Figure S2.** Manhattan plot showing results of the RSV bronchiolitis GWAS (121 cases, 778 controls). X-axis shows chromosomes 1–22, y-axis shows  $-\log_{10} p$  values for all SNPs (starting from 0.01). The stringent level of genome-wide significance ( $p < 5 \times 10^{-8}$ ) was not reached. Blue line represents the threshold of suggestive associations ( $p < 1 \times 10^{-5}$ ). The strongest suggestive signal was detected in the area near genes *VSTM4*, *C10orf71*, and *DRGX* in chromosome 10. The best signal in chromosome 10 was shared between bronchiolitis GWAS and RSV bronchiolitis GWAS.

**Supplementary Table S1.** SNPs that were chosen for replication genotyping in an independent Dutch population ( $p < 5 \times 10^{-4} - 1.2 \times 10^{-7}$  in the whole GWAS population or in the RSV subset of GWAS). Blue shading denotes SNPs with ORs in the same direction in the discovery and replication populations.

| Chr | SNP                      | Variant information   |                                   | A1  | Bronchiolitis GWAS |                      | RSV bronchiolitis GWAS |                      | Replication genotyping |                 |          |
|-----|--------------------------|-----------------------|-----------------------------------|-----|--------------------|----------------------|------------------------|----------------------|------------------------|-----------------|----------|
|     |                          | Location <sup>†</sup> | Genes <sup>**</sup>               |     | OR <sup>‡</sup>    | <i>p</i>             | OR <sup>‡</sup>        | <i>p</i>             | A1                     | OR <sup>†</sup> | <i>p</i> |
| 1   | rs75508464               | 22288656              | <i>CELA3B, HSPG2</i>              | C   | 2.27               | $9.0 \times 10^{-6}$ | 2.21                   | $3.7 \times 10^{-4}$ | C                      | 0.80            | 0.242    |
| 1   | rs522468 <sup>†</sup>    | 36653677              | <i>MAP7D1, TRAPPC3</i>            | T   | 1.33               | 0.023                | 1.78                   | $2.1 \times 10^{-4}$ | -                      | -               | -        |
| 1   | rs35665787 <sup>†</sup>  | 43233988              | <i>C1orf50</i>                    | G   | 1.77               | 0.013                | 2.88                   | $3.4 \times 10^{-5}$ | -                      | -               | -        |
| 1   | rs269101                 | 112628860             | <i>LOC643355, KCND3</i>           | T   | 1.61               | $4.2 \times 10^{-5}$ | 1.70                   | $3.0 \times 10^{-4}$ | T                      | 1.21            | 0.054    |
| 1   | rs269094                 | 112639174             | <i>LOC643355, KCND3</i>           | C   | 1.67               | $5.3 \times 10^{-5}$ | 1.81                   | $1.9 \times 10^{-4}$ | C                      | 1.28            | 0.029    |
| 1   | rs59449379               | 117480316             | <i>PTGFRN</i>                     | A   | 1.85               | $6.8 \times 10^{-5}$ | 2.36                   | $3.2 \times 10^{-6}$ | A                      | 0.69            | 0.018    |
| 1   | rs75940909               | 153932075             | <i>SLC39A1</i>                    | A   | 3.97               | $1.0 \times 10^{-4}$ | 5.58                   | $9.2 \times 10^{-6}$ | A                      | 0.82            | 0.600    |
| 1   | rs186841738 <sup>†</sup> | 154187935             | <i>C1orf43</i>                    | A   | 4.83               | $2.6 \times 10^{-5}$ | 6.73                   | $3.1 \times 10^{-6}$ | -                      | -               | -        |
| 1   | rs35835690 <sup>†</sup>  | 189820786             | <i>LOC107985456, LOC105371657</i> | DEL | 2.80               | $1.1 \times 10^{-5}$ | 2.41                   | 0.0033               | -                      | -               | -        |
| 1   | rs61202512               | 246860213             | <i>LOC102724382, SCCPDH</i>       | A   | 1.67               | $1.6 \times 10^{-5}$ | 1.49                   | 0.0077               | A                      | 1.00            | 0.971    |
| 1   | rs3007311 <sup>†</sup>   | 246866902             | <i>LOC102724382, SCCPDH</i>       | T   | 1.69               | $1.1 \times 10^{-5}$ | 1.62                   | 0.0014               | -                      | -               | -        |
| 2   | rs112913823              | 36617435              | <i>CRMI1</i>                      | G   | 2.65               | $4.8 \times 10^{-5}$ | 4.38                   | $2.4 \times 10^{-6}$ | G                      | 1.15            | 0.483    |
| 2   | rs17749106               | 46719922              | <i>ATP6V1E2</i>                   | C   | 1.66               | $1.4 \times 10^{-5}$ | 1.60                   | 0.0016               | C                      | 1.01            | 0.929    |
| 2   | rs12712976               | 46786491              | <i>RHOQ</i>                       | A   | 0.59               | $8.2 \times 10^{-5}$ | 0.46                   | $1.6 \times 10^{-5}$ | A                      | 1.01            | 0.905    |
| 2   | rs782605 <sup>†</sup>    | 55888413              | <i>PNPT1</i>                      | G   | 2.04               | 0.0061               | 3.61                   | $5.2 \times 10^{-6}$ | -                      | -               | -        |
| 2   | rs706551                 | 55903620              | <i>PNPT1</i>                      | G   | 1.67               | 0.028                | 2.60                   | $1.6 \times 10^{-4}$ | G                      | 1.40            | 0.125    |
| 2   | rs774503                 | 155399735             | <i>LOC105373693</i>               | T   | 1.73               | $2.7 \times 10^{-5}$ | 1.74                   | $6.5 \times 10^{-4}$ | T                      | 0.93            | 0.507    |
| 2   | rs11886348               | 235193436             | <i>LOC105373933</i>               | G   | 3.35               | $2.8 \times 10^{-6}$ | 3.22                   | $1.6 \times 10^{-4}$ | G                      | 1.08            | 0.791    |
| 2   | rs6437298                | 241120401             | <i>OTOS, COPS9</i>                | G   | 1.70               | $2.0 \times 10^{-4}$ | 2.12                   | $2.3 \times 10^{-5}$ | G                      | 0.82            | 0.093    |
| 3   | rs79062720*              | 5442550               | <i>MIR4790, EDEM1</i>             | C   | 3.79               | $4.7 \times 10^{-6}$ | 4.04                   | $8.3 \times 10^{-5}$ | -                      | -               | -        |
| 3   | rs9880307 <sup>†</sup>   | 16974610              | <i>PLCL2</i>                      | A   | 0.69               | 0.0022               | 0.53                   | $5.9 \times 10^{-5}$ | -                      | -               | -        |
| 3   | rs6775709 <sup>†</sup>   | 17114036              | <i>PLCL2</i>                      | C   | 0.73               | 0.0081               | 0.53                   | $5.1 \times 10^{-5}$ | -                      | -               | -        |
| 3   | rs4685426                | 17119238              | <i>PLCL2</i>                      | G   | 0.75               | 0.015                | 0.54                   | $1.0 \times 10^{-4}$ | G                      | 0.98            | 0.845    |
| 3   | rs35439956               | 25953521              | <i>LINC00692, OXSM</i>            | G   | 4.28               | $1.6 \times 10^{-5}$ | 3.92                   | $6.5 \times 10^{-4}$ | G                      | 1.07            | 0.811    |
| 3   | rs7638123 <sup>†</sup>   | 36363607              | <i>STAC, DCLK3</i>                | A   | 2.06               | $7.4 \times 10^{-6}$ | -                      | -                    | -                      | -               | -        |
| 3   | rs2127231                | 36391997              | <i>STAC, DCLK3</i>                | A   | 2.06               | $1.6 \times 10^{-5}$ | 2.43                   | $2.4 \times 10^{-5}$ | A                      | 1.03            | 0.860    |
| 3   | rs56039226 <sup>†</sup>  | 39318192              | <i>CX3CR1</i>                     | A   | 4.43               | $5.7 \times 10^{-5}$ | 4.17                   | $9.8 \times 10^{-4}$ | -                      | -               | -        |
| 3   | rs6437736                | 107208688             | <i>BBX, LOC101929607</i>          | A   | 0.58               | $3.0 \times 10^{-6}$ | 0.63                   | 0.0016               | A                      | 1.18            | 0.088    |
| 3   | rs13079196               | 143197761             | <i>SLC9A9</i>                     | G   | 2.20               | $1.4 \times 10^{-5}$ | 2.45                   | $6.4 \times 10^{-5}$ | G                      | 0.76            | 0.121    |
| 3   | rs35443555               | 143359156             | <i>SLC9A9</i>                     | T   | 2.20               | $4.2 \times 10^{-4}$ | 3.04                   | $1.8 \times 10^{-5}$ | T                      | 0.89            | 0.643    |
| 3   | rs36086140               | 153973898             | <i>ARHGEF26</i>                   | T   | 2.86               | $5.0 \times 10^{-6}$ | 2.85                   | $2.4 \times 10^{-4}$ | T                      | 0.91            | 0.682    |
| 3   | rs6444089                | 185676350             | <i>TRA2B, ETV5</i>                | G   | 0.66               | $6.3 \times 10^{-4}$ | 0.48                   | $8.7 \times 10^{-6}$ | G                      | 1.02            | 0.877    |
| 3   | rs55675198               | 185677615             | <i>TRA2B, ETV5</i>                | DEL | 0.66               | $8.4 \times 10^{-4}$ | 0.46                   | $6.2 \times 10^{-6}$ | DEL                    | 1.02            | 0.822    |
| 4   | rs4697072                | 24735463              | <i>SOD3, CCDC149</i>              | G   | 0.56               | $2.6 \times 10^{-6}$ | 0.56                   | $1.9 \times 10^{-4}$ | G                      | 1.08            | 0.451    |
| 4   | rs4547837                | 32688632              | <i>LOC107986223, LOC101927363</i> | T   | 4.96               | $1.6 \times 10^{-5}$ | 6.55                   | $4.7 \times 10^{-6}$ | T                      | 0.97            | 0.934    |
| 4   | rs79316039 <sup>†</sup>  | 76644558              | <i>G3BP2</i>                      | A   | 2.68               | $3.7 \times 10^{-5}$ | 3.19                   | $5.9 \times 10^{-5}$ | -                      | -               | -        |
| 4   | rs143848875 <sup>†</sup> | 89178625              | <i>PPMIK, ABCG2</i>               | C   | 2.96               | $2.5 \times 10^{-4}$ | 4.05                   | $4.7 \times 10^{-5}$ | -                      | -               | -        |
| 4   | rs7682161                | 89191346              | <i>PPMIK</i>                      | C   | 3.08               | $1.6 \times 10^{-4}$ | 4.17                   | $3.5 \times 10^{-5}$ | C                      | 0.86            | 0.526    |
| 4   | rs1517945                | 137938336             | <i>LOC105377441</i>               | C   | 0.68               | 0.0012               | 0.58                   | $3.5 \times 10^{-4}$ | C                      | 0.89            | 0.216    |
| 5   | rs13182546               | 82831359              | <i>VCAN</i>                       | G   | 1.81               | $2.4 \times 10^{-5}$ | 1.90                   | $2.7 \times 10^{-4}$ | G                      | 1.03            | 0.775    |
| 5   | rs529998                 | 82841764              | <i>VCAN</i>                       | T   | 1.47               | 0.0010               | 1.95                   | $1.7 \times 10^{-5}$ | T                      | 1.09            | 0.391    |

|    |                      |           |                            |     |      |                      |      |                      |             |             |             |
|----|----------------------|-----------|----------------------------|-----|------|----------------------|------|----------------------|-------------|-------------|-------------|
| 5  | rs4976604            | 167849667 | WWC1                       | C   | 3.80 | 4.3×10 <sup>-6</sup> | 3.49 | 4.5×10 <sup>-4</sup> | C           | 0.75        | 0.244       |
| 6  | rs9502516            | 6905830   | RP3-42906.1                | A   | 1.35 | 0.012                | 1.77 | 2.0×10 <sup>-4</sup> | A           | 0.98        | 0.861       |
| 6  | rs2844575†           | 31334945  | HLA-B, MIR6891             | C   | 1.56 | 1.5×10 <sup>-4</sup> | 1.77 | 1.7×10 <sup>-4</sup> | -           | -           | -           |
| 6  | rs1130153†           | 32610947  | HLA-DQA1                   | C   | 2.72 | 7.7×10 <sup>-6</sup> | 1.73 | 0.073                | -           | -           | -           |
| 6  | rs28633411†          | 32613362  | HLA-DQA1                   | A   | 2.58 | 2.9×10 <sup>-5</sup> | 1.63 | 0.120                | -           | -           | -           |
| 6  | rs210183             | 33486841  | BAK1, RN7SL26P-201         | G   | 1.40 | 0.011                | 2.06 | 8.1×10 <sup>-6</sup> | G           | 0.87        | 0.182       |
| 6  | rs210184†            | 33486954  | BAK1, RN7SL26P-201         | G   | -    | -                    | 2.06 | 8.1×10 <sup>-6</sup> | -           | -           | -           |
| 6  | rs210196             | 33507723  | BAK1, RN7SL26P-201         | G   | 1.40 | 0.011                | 2.03 | 1.1×10 <sup>-5</sup> | G           | 0.89        | 0.289       |
| 7  | rs1525738            | 16889926  | AGR3, AGR2                 | T   | 1.35 | 0.0083               | 1.68 | 3.7×10 <sup>-4</sup> | T           | 1.05        | 0.638       |
| 7  | rs10253036           | 46038606  | LOC102723446               | T   | 2.06 | 1.6×10 <sup>-5</sup> | 1.90 | 0.0023               | T           | 0.77        | 0.086       |
| 7  | rs62452699           | 46492326  | LOC105375265, LOC105375266 | T   | 2.83 | 1.5×10 <sup>-7</sup> | 3.37 | 6.9×10 <sup>-7</sup> | T           | 0.82        | 0.234       |
| 7  | rs31674†             | 87068464  | ABCB4                      | A   | 1.67 | 1.1×10 <sup>-4</sup> | 1.85 | 1.9×10 <sup>-4</sup> | <i>tSNP</i> | <i>tSNP</i> | <i>tSNP</i> |
| 7  | <i>tSNP: rs31672</i> |           |                            |     |      |                      |      |                      | C           | 0.89        | 0.321       |
| 7  | rs144739276*         | 120062433 | KCND2                      | G   | 2.27 | 8.8×10 <sup>-5</sup> | 2.86 | 2.8×10 <sup>-5</sup> | -           | -           | -           |
| 7  | rs139743624          | 148870713 | ZNF398                     | A   | 4.25 | 1.8×10 <sup>-4</sup> | 6.51 | 8.5×10 <sup>-6</sup> | A           | 0.82        | 0.511       |
| 8  | rs12541098           | 67336382  | RRS1-AS1                   | T   | 0.64 | 2.0×10 <sup>-4</sup> | 0.57 | 3.2×10 <sup>-4</sup> | T           | 0.88        | 0.221       |
| 8  | rs11985337           | 82443387  | FABP12                     | C   | 1.43 | 0.0040               | 2.00 | 6.1×10 <sup>-6</sup> | C           | 0.95        | 0.673       |
| 9  | rs10738377           | 14757744  | FREMI                      | A   | 0.62 | 8.9×10 <sup>-4</sup> | 0.49 | 3.3×10 <sup>-4</sup> | A           | 0.82        | 0.066       |
| 9  | rs10756611           | 14765611  | FREMI                      | G   | 0.53 | 2.6×10 <sup>-5</sup> | 0.43 | 4.1×10 <sup>-5</sup> | G           | 0.81        | 0.064       |
| 9  | rs6560613            | 80340387  | GNAQ                       | C   | 2.48 | 7.7×10 <sup>-7</sup> | 2.42 | 6.8×10 <sup>-4</sup> | C           | 0.88        | 0.533       |
| 9  | rs3824464            | 114690765 | UGCG                       | G   | 1.52 | 2.7×10 <sup>-4</sup> | 1.36 | 0.036                | G           | 0.93        | 0.510       |
| 9  | rs77887191*          | 118451733 | LOC105376234, LOC105376235 | G   | 2.44 | 0.0013               | 3.58 | 4.2×10 <sup>-5</sup> | -           | -           | -           |
| 10 | rs1334893            | 27693305  | PTCHD3                     | G   | 2.34 | 1.8×10 <sup>-4</sup> | 3.11 | 0.0014               | G           | 1.02        | 0.927       |
| 10 | rs17009617           | 50453933  | VSTM4, C10orf71            | A   | 3.39 | 4.9×10 <sup>-6</sup> | 4.16 | 3.1×10 <sup>-7</sup> | A           | 1.00        | 0.989       |
| 10 | rs76728164           | 50465201  | C10orf71, DRGX             | T   | 2.93 | 3.7×10 <sup>-6</sup> | 3.46 | 3.6×10 <sup>-6</sup> | T           | 1.33        | 0.233       |
| 10 | rs1001338            | 50498449  | C10orf71, DRGX             | G   | 3.10 | 1.7×10 <sup>-6</sup> | 3.89 | 3.6×10 <sup>-7</sup> | G           | 1.38        | 0.183       |
| 10 | rs7099976            | 83865764  | NRG3                       | A   | 1.62 | 2.8×10 <sup>-4</sup> | 1.47 | 0.058                | A           | 0.89        | 0.299       |
| 10 | rs111255454*         | 128777619 | DOCK1                      | G   | 3.90 | 2.1×10 <sup>-6</sup> | 3.03 | 0.0030               | -           | -           | -           |
| 11 | rs9736426†           | 3597515   | LOC101927708, ART5         | G   | 1.63 | 2.1×10 <sup>-4</sup> | 1.67 | 0.0019               | -           | -           | -           |
| 11 | rs75404994†          | 66612234  | RCE1                       | T   | 2.23 | 1.2×10 <sup>-5</sup> | -    | -                    | -           | -           | -           |
| 11 | rs6589464            | 114811893 | ACA59, CADM1               | C   | 0.57 | 3.5×10 <sup>-5</sup> | 0.58 | 0.0015               | C           | 1.07        | 0.486       |
| 12 | rs2137526†           | 17377995  | LOC105369677, LOC105369676 | T   | 1.98 | 3.8×10 <sup>-6</sup> | 2.09 | 8.8×10 <sup>-5</sup> | -           | -           | -           |
| 12 | rs73070967†          | 18375073  | RERGL                      | T   | 1.67 | 2.1×10 <sup>-4</sup> | 2.00 | 4.3×10 <sup>-5</sup> | -           | -           | -           |
| 12 | rs7314145            | 18375513  | RERGL                      | C   | 1.68 | 1.5×10 <sup>-4</sup> | 2.02 | 2.3×10 <sup>-5</sup> | C           | 0.97        | 0.837       |
| 12 | rs7314267            | 76291888  | PHLDA1, LOC105369846       | A   | 1.39 | 0.034                | 1.93 | 2.9×10 <sup>-4</sup> | A           | 0.94        | 0.739       |
| 13 | rs9597824†           | 59313613  | LOC105370220               | G   | 2.16 | 2.0×10 <sup>-6</sup> | 2.03 | 3.6×10 <sup>-4</sup> | -           | -           | -           |
| 13 | rs9591920            | 59315119  | LOC105370220               | T   | 2.16 | 2.0×10 <sup>-6</sup> | 2.03 | 3.5×10 <sup>-4</sup> | T           | 1.41        | 0.023       |
| 13 | rs142670120          | 67850108  | PCDH9, LOC105370246        | DEL | 3.23 | 4.6×10 <sup>-7</sup> | 3.45 | 3.0×10 <sup>-5</sup> | DEL         | 1.14        | 0.408       |
| 13 | rs35746848           | 99059276  | FARP1                      | T   | 2.45 | 1.1×10 <sup>-4</sup> | 3.00 | 9.5×10 <sup>-5</sup> | T           | 0.77        | 0.152       |
| 14 | rs72686085           | 22121065  | TRA                        | C   | 2.26 | 1.7×10 <sup>-4</sup> | 3.81 | 6.2×10 <sup>-6</sup> | C           | 0.75        | 0.248       |
| 14 | rs200994756†         | 22125609  | TRA                        | C   | 2.23 | 0.0020               | 3.79 | 6.9×10 <sup>-6</sup> | -           | -           | -           |
| 14 | rs7159936            | 22172775  | TRA                        | A   | 2.10 | 0.0033               | 3.68 | 6.2×10 <sup>-6</sup> | A           | 0.85        | 0.453       |
| 14 | rs72688054           | 22190160  | TRA                        | C   | 2.11 | 0.0031               | 3.69 | 6.0×10 <sup>-6</sup> | C           | 0.84        | 0.403       |
| 14 | rs7143959±           | 51245666  | NIN                        | T   | 1.32 | 0.0160               | 1.87 | 2.0×10 <sup>-5</sup> | -           | -           | -           |
| 14 | rs714421             | 71359585  | PCNX1, LOC105370557        | T   | 0.73 | 0.0053               | 0.58 | 2.6×10 <sup>-4</sup> | T           | 0.98        | 0.834       |
| 14 | rs8007693            | 80561521  | DIO2, LOC105370591         | C   | 1.43 | 0.0013               | 1.66 | 3.9×10 <sup>-4</sup> | C           | 1.07        | 0.483       |
| 15 | rs114721875π         | 39370956  | LOC105370777               | A   | 2.04 | 0.0029               | 3.21 | 3.5×10 <sup>-5</sup> | -           | -           | -           |

|    |              |          |                                |   |      |                      |      |                      |   |      |       |
|----|--------------|----------|--------------------------------|---|------|----------------------|------|----------------------|---|------|-------|
| 15 | rs75360543   | 39505815 | <i>LOC105370777</i>            | G | 2.46 | 3.0×10 <sup>-4</sup> | 4.10 | 6.5×10 <sup>-7</sup> | G | 0.94 | 0.790 |
| 15 | rs664936     | 59064786 | <i>FAM63B</i>                  | G | 0.62 | 4.4×10 <sup>-4</sup> | 0.69 | 0.030                | G | 1.07 | 0.565 |
| 15 | rs4777160    | 64142539 | <i>HERC1, MIR422A</i>          | C | 0.64 | 1.5×10 <sup>-4</sup> | 0.54 | 5.9×10 <sup>-5</sup> | T | 0.90 | 0.289 |
| 15 | rs192701158† | 82394155 | <i>LINC01583, EFL1</i>         | T | 2.31 | 7.0×10 <sup>-6</sup> | 1.79 | 0.0190               | - | -    | -     |
| 15 | rs950419     | 82398217 | <i>LINC01583, EFL1</i>         | G | 2.26 | 1.3×10 <sup>-5</sup> | 1.87 | 0.0096               | G | 1.01 | 0.960 |
| 15 | rs187513321† | 82398874 | <i>LINC01583, EFL1</i>         | T | 2.31 | 8.1×10 <sup>-6</sup> | 1.91 | 0.0077               | - | -    | -     |
| 16 | rs1507010    | 7657373  | <i>RBFOX1</i>                  | A | 1.58 | 6.1×10 <sup>-5</sup> | 1.79 | 7.7×10 <sup>-5</sup> | A | 0.95 | 0.598 |
| 16 | rs11639567   | 54415702 | <i>LOC100996345, IRX3</i>      | G | 1.40 | 0.0057               | 1.74 | 2.6×10 <sup>-4</sup> | G | 1.11 | 0.292 |
| 16 | rs76079505†  | 73136490 | <i>ZFHX3, C16orf47</i>         | T | 2.22 | 2.4×10 <sup>-6</sup> | -    | -                    | - | -    | -     |
| 16 | rs2240245    | 74758984 | <i>FA2H</i>                    | A | 1.84 | 1.0×10 <sup>-4</sup> | 2.21 | 3.3×10 <sup>-5</sup> | A | 0.91 | 0.475 |
| 17 | rs35739738⌘  | 1023740  | <i>ABR</i>                     | T | 3.11 | 1.9×10 <sup>-5</sup> | 3.19 | 2.9×10 <sup>-4</sup> | - | -    | -     |
| 17 | rs35883991†  | 1023778  | <i>ABR</i>                     | T | 3.13 | 1.7×10 <sup>-5</sup> | 3.28 | 2.2×10 <sup>-4</sup> | - | -    | -     |
| 17 | rs62068097   | 26064677 | <i>NOS2, LGALS9</i>            | A | 2.82 | 0.0013               | 4.19 | 6.6×10 <sup>-5</sup> | A | 1.07 | 0.788 |
| 17 | rs113409681* | 72973962 | <i>HID1, CDR2L</i>             | A | 3.58 | 2.1×10 <sup>-6</sup> | 3.24 | 5.2×10 <sup>-4</sup> | - | -    | -     |
| 18 | rs17446644   | 25694712 | <i>CDH2</i>                    | A | 2.84 | 1.5×10 <sup>-5</sup> | 2.59 | 0.0020               | A | 0.92 | 0.719 |
| 19 | rs2240702    | 4159873  | <i>CREB3L3</i>                 | G | 1.82 | 1.3×10 <sup>-4</sup> | 1.96 | 5.0×10 <sup>-4</sup> | G | 1.03 | 0.857 |
| 19 | rs62124697†  | 8141455  | <i>FBN3</i>                    | A | 5.88 | 6.9×10 <sup>-5</sup> | 8.65 | 3.1×10 <sup>-5</sup> | - | -    | -     |
| 20 | rs144475389  | 17351353 | <i>PCSK2</i>                   | T | 3.09 | 2.8×10 <sup>-5</sup> | 3.62 | 5.7×10 <sup>-5</sup> | T | 1.17 | 0.591 |
| 20 | rs379083*    | 56527179 | <i>MIR4532, LOC100129869</i>   | T | 2.82 | 1.3×10 <sup>-6</sup> | -    | -                    | - | -    | -     |
| 21 | rs242341     | 28966522 | <i>LOC105372763, LINC00113</i> | T | 0.71 | 0.0029               | 0.56 | 1.1×10 <sup>-4</sup> | T | 0.89 | 0.230 |
| 21 | rs1537091    | 29004226 | <i>LOC105372763, LINC00113</i> | A | 1.69 | 1.3×10 <sup>-5</sup> | 1.69 | 7.1×10 <sup>-4</sup> | A | 1.24 | 0.041 |
| 21 | rs9976476    | 29017708 | <i>LOC105372763</i>            | G | 1.65 | 1.7×10 <sup>-5</sup> | 1.71 | 3.2×10 <sup>-4</sup> | G | 1.17 | 0.131 |
| 21 | rs148082602† | 40685515 | <i>BRWD1</i>                   | G | 1.48 | 0.0016               | 1.88 | 4.3×10 <sup>-5</sup> | - | -    | -     |
| 21 | rs78367934†  | 40786828 | <i>LCA5L</i>                   | G | 1.76 | 9.7×10 <sup>-5</sup> | 2.02 | 9.7×10 <sup>-5</sup> | - | -    | -     |
| 21 | rs2837017    | 40788083 | <i>LCA5L</i>                   | A | 1.75 | 1.2×10 <sup>-4</sup> | 1.99 | 1.2×10 <sup>-4</sup> | A | 1.08 | 0.514 |
| 21 | rs73906034   | 40788127 | <i>LCA5L</i>                   | A | 1.79 | 3.2×10 <sup>-4</sup> | 2.31 | 1.9×10 <sup>-5</sup> | A | 1.24 | 0.119 |
| 21 | rs540798     | 40960096 | <i>B3GALT5</i>                 | A | 1.46 | 0.0019               | 1.86 | 5.7×10 <sup>-5</sup> | A | 1.00 | 0.967 |
| 21 | rs117674297⌘ | 42343366 | <i>DSCAM, BACE2</i>            | A | 2.96 | 2.6×10 <sup>-6</sup> | 2.05 | 0.0190               | - | -    | -     |
| 22 | rs5994705    | 33647908 | <i>LARGE</i>                   | C | 1.66 | 2.6×10 <sup>-5</sup> | 1.56 | 0.0034               | C | 0.99 | 0.915 |

Abbreviations: Chr, chromosome; SNP, single nucleotide polymorphism; OR, odds ratio.

⌘Location refers to human genome build 37 (GRCh37/hg19) coordinates.

\*\*Corresponding locus shown for SNPs within genes; two nearest genes shown for intergenic SNPs.

‡ORs for A1 allele in logistic regression under additive model, with three principal components and gender as covariates.

⌘ORs for A1 allele under additive model in logistic regression, with sex as a covariate.

†SNP did not settle in the iPLEX replication genotyping platform.

⌘SNP was monomorphic or had a very low minor allele frequency (<0.01) in replication population.

±SNP deviated from Hardy–Weinberg equilibrium ( $p < 0.001$ ) in replication analysis.

\*SNP was not genotyped in replicate analysis for technical reasons.



**Supplementary Table S2.** Areas (20 kb) around SNPs that have been suggested to play a role in bronchiolitis susceptibility in previous studies screened in our GWAS data. SNPs with  $p \leq 0.01$  (either in GWAS or RSV GWAS) are shown. The exact SNPs previously reported to be associated with bronchiolitis did not show associations or were not present in our data. The best variant was rs56039226 in *CX3CR1* intron ( $p = 5.7 \times 10^{-5}$ ).

| Chr | SNP information  |           |                                                              | A1 | MAF in GWAS |           |          | GWAS          |                      | RSV GWAS      |                      |
|-----|------------------|-----------|--------------------------------------------------------------|----|-------------|-----------|----------|---------------|----------------------|---------------|----------------------|
|     | SNP              | Location  | Genes                                                        |    | cases       | RSV cases | controls | OR $\ddagger$ | $p$                  | OR $\ddagger$ | $p$                  |
| 1   | rs2494251        | 159281151 | 3 kb 3' of <i>FCER1A</i>                                     | A  | 0.408       | 0.409     | 0.469    | 0.73          | 0.0091               | 0.72          | 0.0377               |
| 2   | 2:191844678:TC:T | 191844678 | <i>STAT1</i> intron                                          | T  | 0.026       | 0.029     | 0.008    | 3.89          | 0.0016               | 5.22          | $8.4 \times 10^{-4}$ |
| 3   | rs56039226       | 39318192  | <i>CX3CR1</i> intron                                         | A  | 0.041       | 0.043     | 0.011    | 4.43          | $5.7 \times 10^{-5}$ | 4.17          | $9.8 \times 10^{-4}$ |
| 4   | rs201853366      | 38768759  | 5 kb 3' of <i>TLR10</i>                                      | T  | 0.060       | 0.069     | 0.040    | 1.91          | 0.0125               | 2.31          | 0.0068               |
| 4   | rs12503707       | 74590689  | 15,5 kb 5' of <i>IL8</i>                                     | T  | 0.028       | 0.029     | 0.011    | 2.95          | 0.0071               | 3.41          | 0.0111               |
| 6   | rs9267492        | 31521481  | <i>NFKB1L1</i> intron; 7 kb 5' of <i>LTA</i>                 | T  | 0.036       | 0.042     | 0.014    | 2.66          | 0.0072               | 2.90          | 0.0107               |
| 6   | rs2230365        | 31525448  | <i>NFKB1L1</i> ; 3 kb 5' of <i>LTA</i>                       | T  | 0.171       | 0.176     | 0.133    | 1.57          | 0.0060               | 1.67          | 0.0130               |
| 6   | rs34877047       | 31525738  | <i>NFKB1L1</i> intron; 3 kb 5' of <i>LTA</i>                 | T  | 0.029       | 0.031     | 0.014    | 2.37          | 0.0226               | 3.32          | 0.0087               |
| 6   | rs4947326        | 31533718  | 6 kb 5' of <i>LTA</i>                                        | G  | 0.034       | 0.038     | 0.012    | 2.85          | 0.0059               | 2.95          | 0.0140               |
| 6   | rs4947327        | 31533728  | 6 kb 5' of <i>LTA</i>                                        | A  | 0.034       | 0.038     | 0.012    | 2.85          | 0.0059               | 2.95          | 0.0140               |
| 6   | rs9267497        | 31534500  | 5 kb 5' of <i>LTA</i>                                        | G  | 0.034       | 0.038     | 0.012    | 2.85          | 0.0059               | 2.95          | 0.0140               |
| 6   | rs1799964        | 31542308  | 200 bp 3' of <i>LTA</i>                                      | C  | 0.205       | 0.226     | 0.169    | 1.41          | 0.0161               | 1.58          | 0.0094               |
| 6   | rs1052248        | 31556581  | <i>LST1</i> 3'UTR; near <i>NRC3</i> ; 13.5 kb of <i>TNF</i>  | A  | 0.269       | 0.302     | 0.227    | 1.40          | 0.0108               | 1.63          | 0.0034               |
| 6   | rs3087617        | 31556656  | <i>LST1</i> 3'UTR; near <i>NRC3</i> ; 11 kb 3' of <i>TNF</i> | T  | 0.090       | 0.095     | 0.056    | 1.85          | 0.0050               | 1.82          | 0.0271               |
| 6   | rs34744948       | 31562767  | 17 kb 3' of <i>TNF</i> ; 2 kb 5' of <i>NRC3</i>              | C  | 0.108       | 0.105     | 0.072    | 1.73          | 0.0054               | 1.62          | 0.0538               |
| 6   | rs71563353       | 31562924  | 17 kb 3' of <i>TNF</i> ; 2 kb 5' of <i>NRC3</i>              | T  | 0.108       | 0.105     | 0.072    | 1.73          | 0.0054               | 1.62          | 0.0538               |
| 6   | 6:52064298       | 52064298  | 9 kb 3' of <i>IL17A</i>                                      | C  | 0.026       | 0.038     | 0.011    | 2.78          | 0.0093               | 4.44          | $5.3 \times 10^{-4}$ |
| 8   | rs118073036      | 22027130  | <i>BMP1</i> intron, 5 kb 3' of <i>SFTPC</i>                  | A  | 0.059       | 0.049     | 0.028    | 2.88          | $1.5 \times 10^{-4}$ | 2.37          | 0.0191               |
| 9   | rs79896024       | 120492632 | 13kb 3' of <i>TLR4</i>                                       | G  | 0.035       | 0.046     | 0.016    | 2.29          | 0.0129               | 2.79          | 0.0053               |
| 10  | rs10887238       | 81716268  | <i>SFTPD</i> intron                                          | A  | 0.057       | 0.059     | 0.026    | 2.24          | 0.0027               | 2.34          | 0.0106               |
| 16  | rs147427210      | 27318922  | 6.1 kb 5' of <i>IL4R</i>                                     | G  | 0.031       | 0.014     | 0.011    | 3.49          | 0.0041               | 1.64          | 0.4591               |
| 16  | rs145115415      | 27388083  | 12 kb 3' of <i>IL4R</i>                                      | T  | 0.028       | -         | 0.006    | 1.66          | 0.0023               | -             | -                    |
| 17  | rs28943568       | 26082645  | 1.1 kb 3' of <i>NOS2</i>                                     | A  | 0.066       | 0.088     | 0.039    | 2.05          | 0.0044               | 2.83          | $2.9 \times 10^{-4}$ |
| 17  | rs11653716       | 26084532  | <i>NOS2</i> intron                                           | G  | 0.101       | 0.046     | 0.069    | 2.29          | 0.0129               | 2.88          | 0.0053               |
| 17  | rs200393040      | 34204173  | <i>CCL5</i> intron                                           | CT | 0.031       | 0.047     | 0.016    | 2.03          | 0.047                | 2.76          | 0.0076               |
| 20  | rs17711842       | 3636929   | 3 kb 3' of <i>GFRA4</i> ; 12 kb 3' of <i>ADAM33</i>          | T  | 0.069       | 0.089     | 0.035    | 1.81          | 0.0157               | 2.25          | 0.0040               |
| 20  | rs7266815        | 3639077   | 0.9 kb 3' of <i>GFRA4</i> ; 10 kb 3' of <i>ADAM33</i>        | T  | 0.069       | 0.090     | 0.035    | 1.83          | 0.0141               | 2.29          | 0.0035               |
| 20  | rs7266457        | 3644478   | 0.5 kb 5' of <i>GFRA4</i> ; 4 kb 3' of <i>ADAM33</i>         | T  | 0.076       | 0.098     | 0.036    | 2.01          | 0.0036               | 2.53          | $7.8 \times 10^{-4}$ |
| 20  | rs369784662      | 3645117   | 1 kb 5' of <i>GFRA4</i> ; 3.5 kb 3' of <i>ADAM33</i>         | A  | 0.075       | 0.098     | 0.036    | 1.98          | 0.0047               | 2.49          | $9.5 \times 10^{-4}$ |
| 20  | rs41530048       | 3651497   | <i>ADAM33</i> intron                                         | A  | 0.079       | 0.103     | 0.035    | 2.08          | 0.0020               | 2.60          | $4.2 \times 10^{-4}$ |
| 20  | rs3918393        | 3653642   | <i>ADAM33</i> intron                                         | T  | 0.072       | 0.095     | 0.035    | 1.85          | 0.0109               | 2.32          | 0.0023               |
| 20  | rs150996533      | 3664915   | 2 kb 5' of <i>ADAM33</i>                                     | G  | -           | 0.103     | 0.044    | -             | -                    | 2.23          | 0.0033               |

|    |             |          |                                                        |   |       |       |       |      |        |      |        |
|----|-------------|----------|--------------------------------------------------------|---|-------|-------|-------|------|--------|------|--------|
| 20 | rs78761371  | 3665371  | 3 kb 5' of <i>ADAM33</i> ; 2,2 kb 3' of <i>SIGLECI</i> | G | -     | 0.103 | 0.043 | -    | -      | 2.28 | 0.0026 |
| 20 | rs17701662  | 3670512  | <i>SIGLECI</i> intron; 8 kb 5' of <i>ADAM33</i>        | T | -     | 0.102 | 0.044 | -    | -      | 2.22 | 0.0033 |
| 21 | rs143991016 | 42809489 | <i>MXI</i> intron                                      | G | 0.030 | 0.029 | 0.012 | 3.05 | 0.0038 | 2.96 | 0.0233 |
| 21 | rs113340440 | 42811078 | <i>MXI</i> intron                                      | A | 0.049 | 0.058 | 0.021 | 2.61 | 0.0016 | 2.94 | 0.0023 |
| 21 | rs77214232  | 42812445 | <i>MXI</i> intron                                      | T | 0.032 | 0.033 | 0.012 | 2.94 | 0.0039 | 2.87 | 0.0212 |
| 21 | rs2238714   | 42815008 | <i>MXI</i> intron                                      | C | 0.035 | 0.033 | 0.012 | 3.06 | 0.0024 | 2.87 | 0.0212 |
| 21 | rs2075804   | 42815974 | <i>MXI</i> intron                                      | A | 0.035 | 0.033 | 0.012 | 3.06 | 0.0024 | 2.87 | 0.0212 |
| 21 | rs34937035  | 42817245 | <i>MXI</i> intron                                      | C | 0.035 | 0.033 | 0.012 | 3.35 | 0.0012 | 3.24 | 0.0108 |
| 21 | rs192084957 | 42818272 | <i>MXI</i> intron                                      | C | 0.035 | 0.033 | 0.012 | 3.06 | 0.0024 | 2.87 | 0.0212 |
| 21 | rs74655087  | 42818844 | <i>MXI</i> intron                                      | A | 0.035 | 0.033 | 0.012 | 3.06 | 0.0024 | 2.87 | 0.0212 |
| 21 | rs74429776  | 42819339 | <i>MXI</i> intron                                      | A | 0.035 | 0.033 | 0.012 | 3.06 | 0.0024 | 2.86 | 0.0215 |
| 21 | rs116868083 | 42834988 | 1.5 kb 3' of <i>TMPRSS2</i> ; 4 kb 3' of <i>MXI</i>    | A | 0.021 | -     | 0.007 | 3.94 | 0.0038 | -    | -      |
| 21 | rs8133614   | 42835739 | 5 kb 3' of <i>MXI</i> ; 1 kb 3' of <i>TMPRSS2</i>      | G | 0.023 | 0.025 | 0.010 | 3.37 | 0.0076 | 3.89 | 0.0086 |
| 21 | rs12627374  | 42837691 | 5 kb 3' of <i>MXI</i> ; 3' UTR of <i>TMPRSS2</i>       | T | 0.021 | -     | 0.008 | 3.34 | 0.0098 | -    | -      |
| 21 | rs80325088  | 46329175 | <i>ITGB2</i> intron                                    | T | 0.046 | 0.043 | 0.024 | 2.29 | 0.0076 | 2.09 | 0.0646 |

Abbreviations: Chr, chromosome; SNP, single nucleotide polymorphism; OR, odds ratio; MAF, minor allele frequency.

✂Location refers to human genome build 37 (GRCh37/hg19) coordinates.

‡ORs for A1 allele in logistic regression under additive model, with three principal components and gender as covariates.

**Supplementary Table S3.** Areas (20 kb) around SNPs that have been suggested to play a role in asthma susceptibility in previous studies (SNPs in the NHGRI-EBI GWAS Catalog with  $p \leq 10^{-6}$ ) screened in our GWAS data. SNPs with  $p \leq 0.0001$  either in GWAS, RSV GWAS, or GWAS <1 year are shown.

| SNP            | Variant details |                       |                             | A1 | GWAS            |                      | RSV GWAS        |                      | GWAS <1 year    |                      |
|----------------|-----------------|-----------------------|-----------------------------|----|-----------------|----------------------|-----------------|----------------------|-----------------|----------------------|
|                | Chr             | Location <sup>⌘</sup> | Genes                       |    | OR <sup>‡</sup> | $p$                  | OR <sup>‡</sup> | $p$                  | OR <sup>‡</sup> | $p$                  |
| rs13182546     | 5               | 82831359              | <i>VCAN</i> intron          | G  | 1.813           | $2.4 \times 10^{-5}$ | -               | -                    | -               | -                    |
| rs13159438     | 5               | 82839305              | <i>VCAN</i> intron          | T  | 1.817           | $2.2 \times 10^{-5}$ | 1.906           | $2.6 \times 10^{-4}$ | 1.779           | $2.2 \times 10^{-3}$ |
| rs529998       | 5               | 82841764              | <i>VCAN</i> intron          | T  | 1.473           | 0.0010               | 1.952           | $1.7 \times 10^{-5}$ | -               | -                    |
| rs647873       | 5               | 82843440              | <i>VCAN</i> intron          | C  | -               | -                    | 1.925           | $2.0 \times 10^{-5}$ | -               | -                    |
| rs9271499      | 6               | 32589291              | 6.7kb 5' of <i>HLA-DQA1</i> | T  | 1.517           | $3.7 \times 10^{-4}$ | 1.670           | $6.1 \times 10^{-4}$ | 1.766           | $2.0 \times 10^{-5}$ |
| rs9271500      | 6               | 32589300              | 6.7kb 5' of <i>HLA-DQA1</i> | T  | 1.452           | 0.0012               | 1.555           | 0.0028               | 1.692           | $6.2 \times 10^{-5}$ |
| rs9271501      | 6               | 32589301              | 6.7kb 5' of <i>HLA-DQA1</i> | G  | 1.452           | 0.0012               | 1.555           | 0.0028               | 1.692           | $6.2 \times 10^{-5}$ |
| rs9271502      | 6               | 32589305              | 6.7kb 5' of <i>HLA-DQA1</i> | A  | 1.523           | $3.3 \times 10^{-4}$ | 1.676           | $5.6 \times 10^{-4}$ | 1.772           | $1.8 \times 10^{-5}$ |
| rs9271566      | 6               | 32590443              | 5.5kb 5' of <i>HLA-DQA1</i> | G  | 1.573           | $7.8 \times 10^{-5}$ | 1.697           | $3.1 \times 10^{-4}$ | 1.821           | $5.2 \times 10^{-6}$ |
| rs9271567      | 6               | 32590456              | 5.5kb 5' of <i>HLA-DQA1</i> | T  | 1.573           | $7.8 \times 10^{-5}$ | 1.697           | $3.1 \times 10^{-4}$ | 1.821           | $5.2 \times 10^{-6}$ |
| rs9271597      | 6               | 32591291              | 4.7kb 5' of <i>HLA-DQA1</i> | A  | 1.459           | $6.9 \times 10^{-4}$ | 1.585           | 0.0011               | 1.650           | $7.5 \times 10^{-5}$ |
| rs9271600      | 6               | 32591332              | 4.6kb 5' of <i>HLA-DQA1</i> | G  | 1.478           | $4.7 \times 10^{-4}$ | 1.601           | $9.0 \times 10^{-4}$ | 1.665           | $5.8 \times 10^{-5}$ |
| rs9271601      | 6               | 32591337              | 4.6kb 5' of <i>HLA-DQA1</i> | T  | 1.478           | $4.7 \times 10^{-4}$ | 1.601           | $9.0 \times 10^{-4}$ | 1.665           | $5.8 \times 10^{-5}$ |
| rs142530081    | 6               | 32606682              | <i>HLA-DQA1</i> intron      | G  | 2.561           | $3.1 \times 10^{-5}$ | 1.581           | 0.1419               | 2.030           | 0.0079               |
| rs36223157     | 6               | 32606691              | <i>HLA-DQA1</i> intron      | G  | 2.561           | $3.1 \times 10^{-5}$ | 1.581           | 0.1419               | 2.030           | 0.0079               |
| rs1130153      | 6               | 32610947              | <i>HLA-DQA1</i> 3'-UTR      | C  | 2.716           | $7.7 \times 10^{-6}$ | 1.732           | 0.0725               | 2.260           | 0.0018               |
| rs9282052      | 6               | 32613360              | <i>HLA-DQA1</i> 3'-UTR      | CA | 1.790           | $1.4 \times 10^{-4}$ | -               | -                    | 1.996           | $5.6 \times 10^{-5}$ |
| rs28633411     | 6               | 32613362              | <i>HLA-DQA1</i> intron      | A  | 2.580           | $2.9 \times 10^{-5}$ | 1.634           | 0.1164               | 2.076           | 0.0063               |
| rs28375404     | 6               | 32614917              | <i>HLA-DQA1</i> intron      | T  | 2.557           | $2.8 \times 10^{-5}$ | 1.671           | 0.0930               | 2.067           | 0.0058               |
| rs28819191     | 6               | 32622110              | <i>HLA-DQA1</i> intron      | A  | 2.659           | $1.4 \times 10^{-5}$ | 1.619           | 0.1231               | 2.157           | 0.0036               |
| 6:32631070:T:C | 6               | 32631070              | <i>HLA-DQB1</i> intron      | C  | 2.690           | $7.4 \times 10^{-5}$ | 2.464           | 0.0030               | 2.357           | 0.0023               |
| rs73729452     | 6               | 32632547              | <i>HLA-DQB1</i> intron      | C  | 2.448           | $7.0 \times 10^{-5}$ | 1.434           | 0.2581               | 1.970           | 0.0105               |
| rs9788617      | 14              | 51244776              | <i>NIN</i> intron           | G  | 1.277           | 0.0339               | 1.814           | $5.7 \times 10^{-5}$ | 1.367           | 0.0160               |
| rs7143959      | 14              | 51245666              | <i>NIN</i> intron           | T  | 1.317           | 0.0158               | 1.865           | $2.0 \times 10^{-5}$ | 1.413           | 0.0071               |
| rs34148215     | 14              | 51249238              | <i>NIN</i> intron           | T  | 1.290           | 0.0270               | 1.804           | $6.1 \times 10^{-5}$ | 1.376           | 0.0136               |
| rs764964       | 14              | 51254908              | <i>NIN</i> intron           | T  | 1.322           | 0.0198               | 1.887           | $3.2 \times 10^{-5}$ | 1.440           | 0.0065               |
| rs11157766     | 14              | 51262497              | <i>NIN</i> intron           | A  | 1.374           | 0.0073               | 1.950           | $1.3 \times 10^{-5}$ | 1.461           | 0.0045               |
| rs12881609     | 14              | 51263301              | <i>NIN</i> intron           | C  | 1.399           | 0.0048               | 1.980           | $8.3 \times 10^{-6}$ | 1.485           | 0.0033               |

SNP, single nucleotide polymorphism; GWAS, genome-wide association study; Chr, chromosome; OR, odds ratio.

<sup>⌘</sup>Location refers to human genome build 37 (GRCh37/hg19) coordinates.

<sup>‡</sup>ORs for A1 allele in logistic regression under additive model, with three principal components and gender as covariates

**Supplementary Table S4.** Meta-analyses<sup>§</sup> for SNPs that had a *p* value of <0.1 in the Dutch replicate and ORs in the same direction with GWASs.

| Variant details |     |                       |                                           |    | GWAS            |                      | RSV GWAS        |                      | GWAS < 1 year   |                      | Replication, NL |          | Meta-analysis: NL, GWAS |                      | Meta-analysis: NL, RSV GWAS |                      | Meta-analysis: NL, GWAS <1year |                      |
|-----------------|-----|-----------------------|-------------------------------------------|----|-----------------|----------------------|-----------------|----------------------|-----------------|----------------------|-----------------|----------|-------------------------|----------------------|-----------------------------|----------------------|--------------------------------|----------------------|
| SNP             | Chr | Location <sup>¶</sup> | Genes <sup>**</sup>                       | A1 | OR <sup>‡</sup> | <i>p</i>             | OR <sup>‡</sup> | <i>p</i>             | OR <sup>‡</sup> | <i>p</i>             | OR <sup>⊔</sup> | <i>p</i> | OR                      | <i>p</i>             | OR                          | <i>p</i>             | OR                             | <i>p</i>             |
| rs269101        | 1   | 112628860             | <i>LOC643355</i> ,<br><i>KCND3</i>        | T  | 1.605           | 4.2×10 <sup>-5</sup> | 1.703           | 3.0×10 <sup>-4</sup> | 1.599           | 2.4×10 <sup>-4</sup> | 1.213           | 0.0541   | 1.368                   | 3.5×10 <sup>-5</sup> | 1.350                       | 2.9×10 <sup>-4</sup> | 1.348                          | 1.5×10 <sup>-4</sup> |
| rs269094        | 1   | 112639174             | <i>LOC643355</i> ,<br><i>KCND3</i>        | C  | 1.672           | 5.3×10 <sup>-5</sup> | 1.809           | 1.9×10 <sup>-4</sup> | 1.757           | 5.2×10 <sup>-5</sup> | 1.281           | 0.0292   | 1.442                   | 1.5×10 <sup>-5</sup> | 1.439                       | 8.1×10 <sup>-5</sup> | 1.453                          | 2.2×10 <sup>-5</sup> |
| rs10738377      | 9   | 14757744              | <i>FREMI1</i>                             | A  | 0.619           | 8.9×10 <sup>-4</sup> | 0.487           | 3.3×10 <sup>-4</sup> | 0.662           | 0.0085               | 0.816           | 0.0657   | 0.737                   | 5.0×10 <sup>-4</sup> | 0.723                       | 8.2×10 <sup>-4</sup> | 0.761                          | 0.0025               |
| rs10756611      | 9   | 14765611              | <i>FREMI1</i>                             | G  | 0.534           | 2.6×10 <sup>-5</sup> | 0.431           | 4.1×10 <sup>-5</sup> | 0.574           | 6.1×10 <sup>-4</sup> | 0.813           | 0.0638   | 0.699                   | 6.2×10 <sup>-5</sup> | 0.704                       | 3.3×10 <sup>-4</sup> | 0.727                          | 5.2×10 <sup>-4</sup> |
| rs9591920       | 13  | 59315119              | <i>LOC105370220</i>                       | T  | 2.162           | 2.0×10 <sup>-6</sup> | 2.033           | 3.5×10 <sup>-4</sup> | 1.853           | 7.1×10 <sup>-4</sup> | 1.405           | 0.0227   | 1.712                   | 9.8×10 <sup>-7</sup> | 1.606                       | 7.1×10 <sup>-5</sup> | 1.570                          | 9.2×10 <sup>-5</sup> |
| rs1537091       | 21  | 29004226              | <i>LOC105372763</i> ,<br><i>LINC00113</i> | A  | 1.691           | 1.3×10 <sup>-5</sup> | 1.693           | 7.1×10 <sup>-4</sup> | 1.606           | 4.5×10 <sup>-4</sup> | 1.240           | 0.0408   | 1.418                   | 1.1×10 <sup>-5</sup> | 1.367                       | 3.3×10 <sup>-4</sup> | 1.367                          | 1.6×10 <sup>-4</sup> |

Abbreviations: SNP, single nucleotide polymorphism; Chr, chromosome; OR, odds ratio; NL, Dutch replication population.

<sup>§</sup>Meta-analyses performed under fixed-effects model for logistic regression result files of discovery and replication data.

<sup>¶</sup>Location refers to human genome build 37 (GRCh37/hg19) coordinates.

<sup>\*\*</sup>Corresponding locus shown for SNPs within genes; two nearest genes shown for intergenic SNPs.

<sup>‡</sup>ORs for A1 allele in logistic regression under additive model, with three principal components and gender as covariates.

<sup>⊔</sup>ORs for A1 allele under additive model in logistic regression, with sex as a covariate.

**Supplementary Table S5.** SNPs that had a p-value < 0.05 in the Dutch replication population (NL) were further studied in the Finnish case set from Turku, with NordicDB population controls as a reference.

| Variant information |     |                       |                                | GWAS |                 |                      | Replication, NL |          | Replication, Turku (FIN) |          |
|---------------------|-----|-----------------------|--------------------------------|------|-----------------|----------------------|-----------------|----------|--------------------------|----------|
| SNP                 | Chr | Location <sup>⌘</sup> | Genes <sup>**</sup>            | A1   | OR <sub>‡</sub> | <i>p</i>             | OR <sub>⌘</sub> | <i>p</i> | OR <sub>⌘</sub>          | <i>p</i> |
| rs269094            | 1   | 112639174             | <i>LOC643355, KCND3</i>        | C    | 1.672           | 5.3×10 <sup>-5</sup> | 1.281           | 0.0292   | 0.989                    | 0.9352   |
| rs9591920           | 13  | 59315119              | <i>LOC105370220</i>            | T    | 2.162           | 2.0×10 <sup>-6</sup> | 1.405           | 0.0227   | 1.469                    | 0.0415   |
| rs1537091           | 21  | 29004226              | <i>LOC105372763, LINC00113</i> | A    | 1.691           | 1.3×10 <sup>-5</sup> | 1.240           | 0.0408   | 1.167                    | 0.2290   |

Abbreviations: GWAS, genome-wide association study; NL, Dutch population; SNP, single nucleotide polymorphism; Chr, chromosome; OR, odds ratio.

<sup>⌘</sup>Location refers to human genome build 37 (GRCh37/hg19) coordinates.

<sup>\*\*</sup>Corresponding locus shown for SNPs within genes; two nearest genes shown for intergenic SNPs.

<sup>‡</sup>ORs for A1 allele in logistic regression under additive model, with three principal components and gender as covariates.

<sub>⌘</sub>ORs are for A1 allele under additive model in logistic regression with sex as a covariate.

**Supplementary Table S6.** Arrays used to genotype GWAS discovery populations.

| GWAS population                    | Genome-wide genotyping method              |
|------------------------------------|--------------------------------------------|
| Kuopio (FIN), Gothenburg (SWE)     | HumanOmniExpress BeadChip, Illumina        |
| Tampere cases (FIN)                | Infinium HumanCoreExome BeadChip, Illumina |
| NordicDB population controls (FIN) | HumanCNV-370-v1.0, Illumina                |

Abbreviations: GWAS, genome-wide association study; FIN, Finland; SWE, Sweden
